# Supplementary material for: Development of diagnostic PCR and LAMP markers for MALE STERILITY 1 (MS1) in Cryptomeria japonica D. Don
Source: PubMed Central journal article supplement (PMC7526249; doi:10.1186/s13104-020-05296-8), 2020-09-29
Supplement: 13104_2020_5296_MOESM3_ESM.pdf [file 13104_2020_5296_MOESM3_ESM.pdf]

## (a) ALP\_ms1-1

Amplified fragment length polymorphism (ALP) marker to detect *ms1-1* allele in *MALE STERILITY 1 (MS1)* in sugi.

| Reaction                         | Volume ( $\mu\text{L}$ ) |
|----------------------------------|--------------------------|
| 2 $\times$ Multiplex (QIAGEN)    | 3                        |
| 2 $\mu\text{M}$ CJt020762_F145   | 1                        |
| 2 $\mu\text{M}$ CJt020762_R294_A | 0.5                      |
| 2 $\mu\text{M}$ Tail_A           | 0.5                      |
| dH <sub>2</sub> O                | 4                        |
| DNA (10—50 ng)                   | 1                        |
| Total ( $\mu\text{L}$ )          | 10                       |

| Temperature ( $^{\circ}\text{C}$ ) |          | Cycles |
|------------------------------------|----------|--------|
| 95                                 | 15 min   | 1      |
| 94                                 | 15 sec   |        |
| 63                                 | 45 sec   | 38     |
| 72                                 | 15 sec   |        |
| 60                                 | 30 min   | 1      |
| 4                                  | $\infty$ | 1      |

| Primer ID        | Primer sequence                        |
|------------------|----------------------------------------|
| CJt020762_F145   | CCATGCCTTTCTTACATGACGAG                |
| CJt020762_R294_A | GCCTCCCTCGCGCCATTGATTAATGGGAAAGCCCAGAA |
| Tail A           | [FAM]-GCCTCCCTCGCGCCA                  |

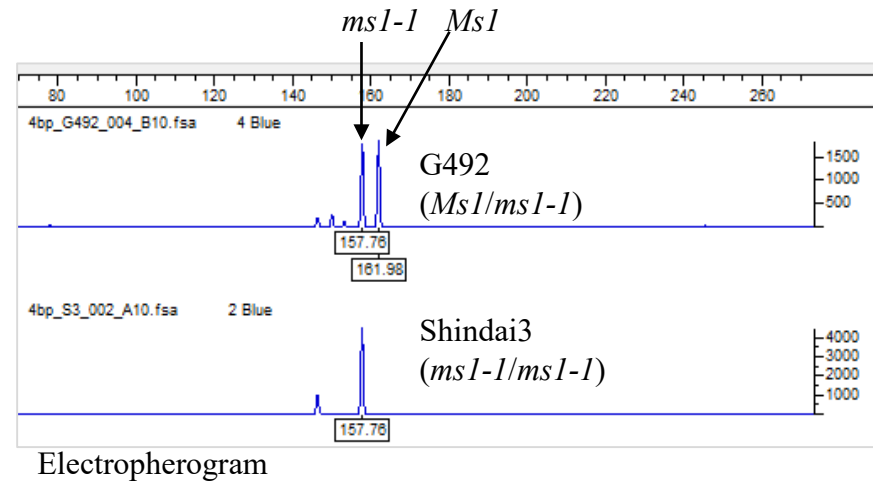

## (b) ALP\_ms1-2

Amplified length polymorphism (ALP) marker to detect *msl-2* allele in *MALE STERILITY 1* (*MSI*) in sugi.

| Reaction                           | Volume ( $\mu\text{L}$ ) |
|------------------------------------|--------------------------|
| 2 $\times$ Multiplex (QIAGEN)      | 3                        |
| 2 $\mu\text{M}$ CJt020762_F1O7.F_A | 1                        |
| 2 $\mu\text{M}$ CJt020762_F1O7.R   | 0.5                      |
| 2 $\mu\text{M}$ Tail_A             | 0.5                      |
| dH <sub>2</sub> O                  | 4                        |
| DNA (10–50 ng)                     | 1                        |
| Total ( $\mu\text{L}$ )            | 10                       |

| Temperature ( $^{\circ}\text{C}$ ) |          | Cycles |
|------------------------------------|----------|--------|
| 95                                 | 15 min   | 1      |
| 94                                 | 15 sec   |        |
| 63                                 | 45 sec   | 38     |
| 72                                 | 15 sec   |        |
| 60                                 | 30 min   | 1      |
| 4                                  | $\infty$ | 1      |

| Primer ID          | Primer sequence                        |
|--------------------|----------------------------------------|
| CJt020762_F1O7.F_A | GCCTCCCTCGCGCCACCTCCGGTGTATCAAACCTTCAA |
| CJt020762_F1O7.R   | ATTCGCCCTTTCCAAATGTTAGC                |
| Tail A             | [FAM]-GCCTCCCTCGCGCCA                  |

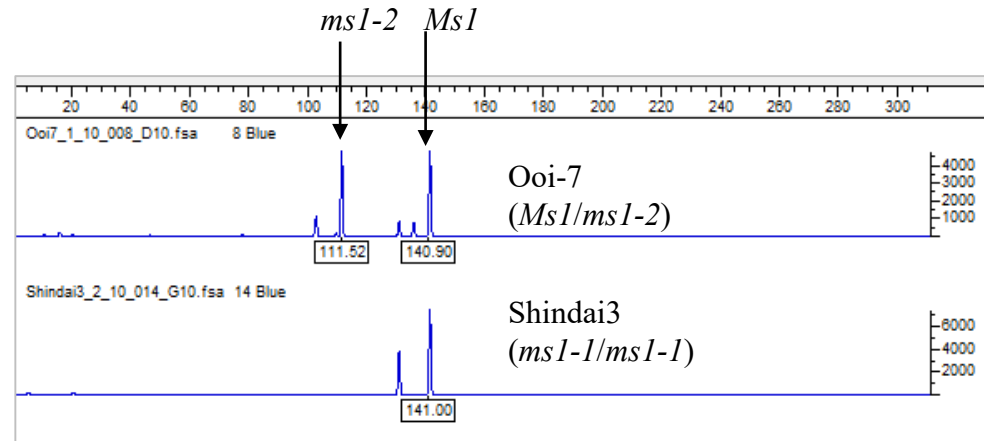

Electropherogram

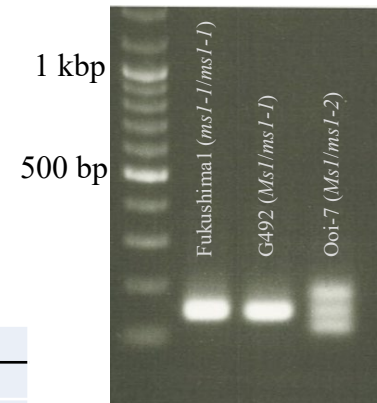

Gel image (2% agarose)

### (c) ALP\_ms1

Amplified length polymorphism marker (ALP) for *MALE STERILITY 1* (*MS1*) in sugi. Two mutant alleles (*ms1-1* and *ms1-2*) and rest of the wild type alleles (*Ms1*) can be detected simultaneously by multiplex PCR.

| Reaction                                  | Volume (mL) |
|-------------------------------------------|-------------|
| KAPA2G Fast DNA Polymerase (5 U/ $\mu$ L) | 0.1         |
| 5 $\times$ KAPA2G Buffer A <sup>§</sup>   | 2.0         |
| 25 mM MgCl <sub>2</sub>                   | 0.2         |
| dNTP Mix (10 mM each)                     | 0.2         |
| 5 $\mu$ M CJt020762_ms1-1_F               | 0.4         |
| 5 $\mu$ M CJt020762_ms1-1_R               | 0.4         |
| 5 $\mu$ M CJt020762_ms1-2_F               | 0.2         |
| 5 $\mu$ M CJt020762_ms1-2_R               | 0.2         |
| dH <sub>2</sub> O                         | 5.3         |
| DNA (5 ng/ $\mu$ L)                       | 1.0         |
| <b>Total (mL)</b>                         | <b>10</b>   |

<sup>§</sup> 1  $\times$  KAPA2G Buffer A contains 1.5 mM MgCl<sub>2</sub>

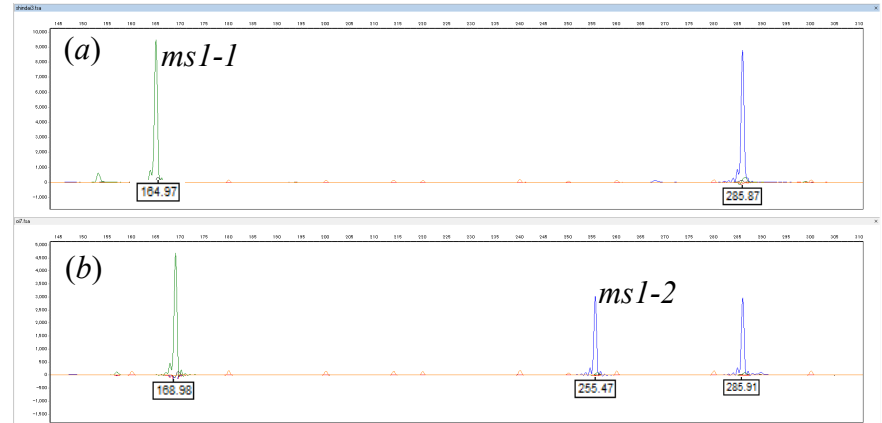

Electropherogram for (a) Shindai3 (*ms1-1/ms1-1*) and (b) Ooi-7 (*Ms1/ms1-2*)

| Temperature (°C) |          | Cycles |
|------------------|----------|--------|
| 95               | 3 min    | 1      |
| 95               | 15 sec   |        |
| 60               | 15 sec   | 35     |
| 72               | 1 sec    |        |
| 72               | 1 min    | 1      |
| 4                | $\infty$ | 1      |

| Primer ID         | Primer sequence      |
|-------------------|----------------------|
| CJt020762_ms1-1_F | GCTATAGACTGCACCGACCC |
| CJt020762_ms1-1_R | AGCCCAGAAAATCGTCCCTG |
| CJt020762_ms1-2_F | GAATCCACCGCCACGACTAT |
| CJt020762_ms1-2_R | TGAACTCTGTTTCCATGGCA |

### (d) ASP\_ms1-1 and (e) ASP\_ms1-1\_wt

Allele specific PCR reaction to detect *ms1-1* (d) and *Ms1* (e) allele in *MALE STERILITY 1 (MSI)* in sugi.

| Reaction                        |    |
|---------------------------------|----|
| 2 × Multiplex (QIAGEN)          | 3  |
| 2 μM CJt020762_ASP <sup>s</sup> | 1  |
| 2 μM CJt020762common.r          | 1  |
| 2 μM CS1364_F                   | 1  |
| 2 μM CS1364_R                   | 1  |
| dH <sub>2</sub> O               | 2  |
| DNA                             | 1  |
| Total (μL)                      | 10 |

<sup>s</sup> Primer ID for ASP targeting (d) *ms1-1* and (e) *Ms1* is CJt020762\_mt-224F\_C.f and CJt020762\_WT-227F\_A.f, respectively.

| Temperature (°C) |        | Cycles |
|------------------|--------|--------|
| 95               | 15 min | 1      |
| 94               | 15 sec |        |
| 56               | 45 sec | 38     |
| 72               | 15 sec |        |
| 4                | ∞      | 1      |

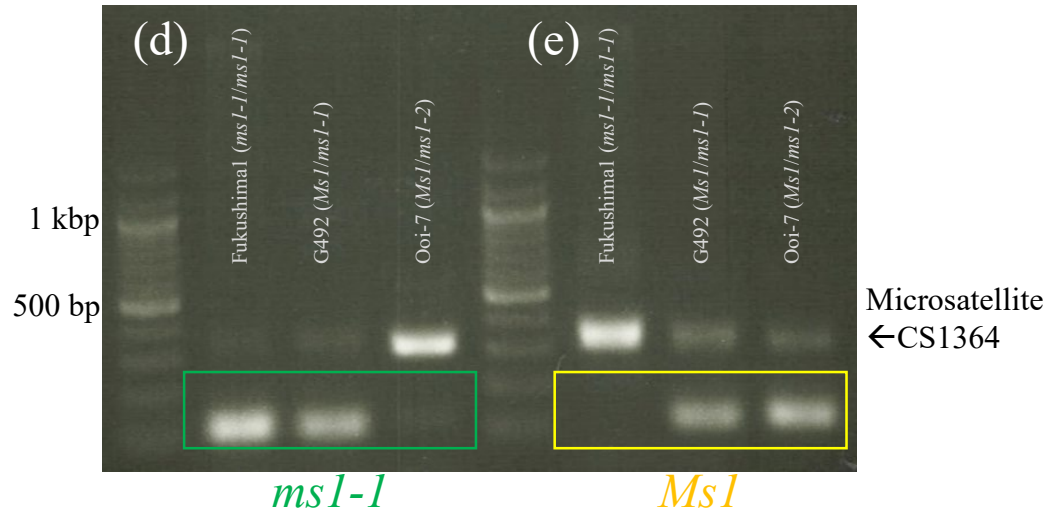

Gel image (2% agarose)

Amplification of CS1364 is suppressed if that of ASP surpasses.

| Primer ID             | Primer sequence              |
|-----------------------|------------------------------|
| CJt020762_mt-224F_C.f | CTGTGACTCACTGGCCACAGTAAC     |
| CJt020762_WT-227F_A.f | GTGACTCACTGGCCACAGTCATAAA    |
| CJt020762common.r     | AGAGAGTGATGGTTTGATTAATGGGAAA |
| CS1364_F              | TGATTATGGTTCGGTGGTCTT        |
| CS1364_R              | GTGATGTGGTGTTATCTTGT         |

## (f) LAMP\_ms1-1

LAMP reaction to detect *ms1-1* allele in *MALE STERILITY 1* (*MS1*) in sugi.

| Reaction                     |      |
|------------------------------|------|
| 2 x RM                       | 12.5 |
| 40 $\mu$ M FIP (4D-1_FIP)    | 1    |
| 40 $\mu$ M BIP (4D-1_BIP-3C) | 1    |
| 5 $\mu$ M F3 (4D-1_F3)       | 1    |
| 5 $\mu$ M B3 (4D-1_B3)       | 1    |
| <i>Bst</i> DNA polymerase    | 1    |
| DNA                          | 2    |
| dH <sub>2</sub> O            | 5.5  |
| Total ( $\mu$ L)             | 25   |

| Temperature ( °C) |         |
|-------------------|---------|
| 63                | 120 min |
| 80                | 5 min   |

| Primer ID   | Primer sequence                            |
|-------------|--------------------------------------------|
| 4D-1_FIP    | ACGATGGGGTCGGTGCAGTCTAGCGGTAGCAGAAAGTGTGAT |
| 4D-1_BIP-3C | ACGAGATCAGCCAAGCTTTCCAACCTGCGTGGGTCTG      |
| 4D-1_F3     | GCGGCAATTGTGAGAGCATT                       |
| 4D-1_B3     | GAAAATCGTCCCTGGAGACG                       |

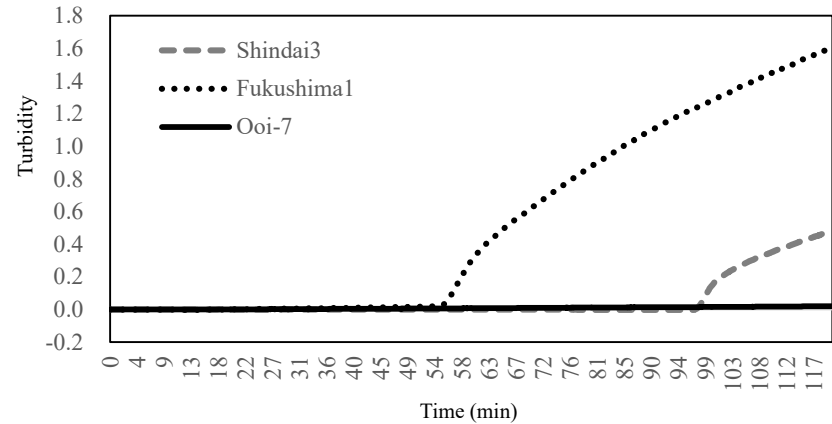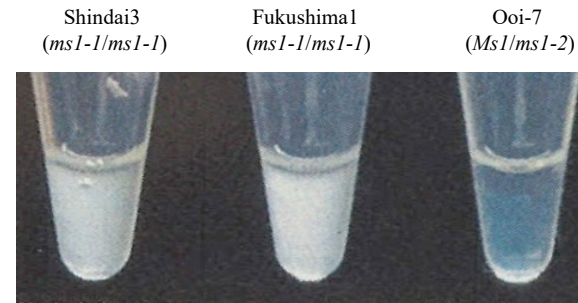

White precipitate was generated after 120 min incubation for assay with *ms1-1*.

## (g) LAMP\_ms1-1\_wt

LAMP marker to detect wild type allele (*MsI*) without 4-bp deletion.

| Reaction                           |      |
|------------------------------------|------|
| 2xRM                               | 12.5 |
| 40 $\mu$ M FIP (MS1-190727_FIP-2A) | 1    |
| 40 $\mu$ M BIP (MS1-190727_BIP)    | 1    |
| 5 $\mu$ M F3 (MS1-190727_F3)       | 1    |
| 5 $\mu$ M B3 (MS1-190727_B3)       | 1    |
| <i>Bst</i> DNA polymerase          | 1    |
| DNA                                | 2    |
| dH <sub>2</sub> O                  | 5.5  |
| Total ( $\mu$ L)                   | 25   |

| Temperature ( °C) |         |
|-------------------|---------|
| 63                | 120 min |
| 80                | 5 min   |

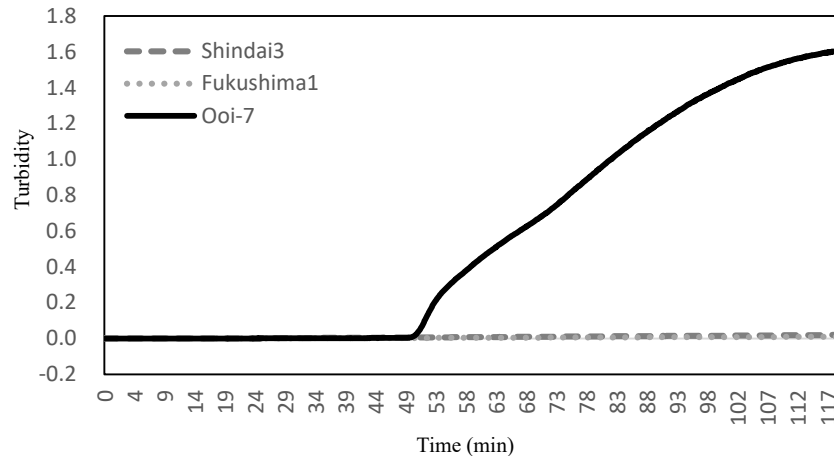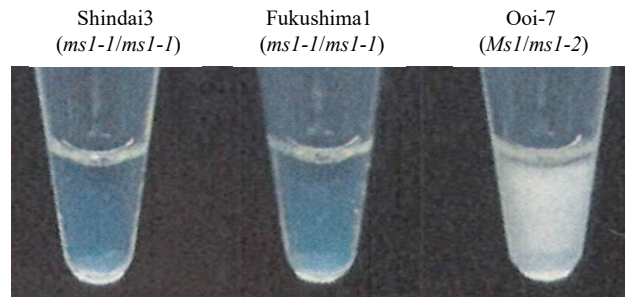

White precipitate was generated after 120 min incubation for assay with *MsI*

| Primer ID         | Primer sequence                            |
|-------------------|--------------------------------------------|
| MS1-190727_FIP-2A | TATTGATGACTGTGGCCAGTGAAGATCAGCCAAGCTTTCCAT |
| MS1-190727_BIP    | GGTGCTTGTGCGAGCTCGTCGGAGCGAGAGAGTGATGGTT   |
| MS1-190727_F3     | ATCGTGAGCCTCTCACCA                         |
| MS1-190727_B3     | GGTCAAGTTCACGCGGATA                        |

## (h) LAMP\_ms1-2

LAMP reaction to detect *ms1-2* allele in *MALE STERILITY 1 (MS1)* in sugi.

| Reaction                  |      |
|---------------------------|------|
| 2xRM                      | 12.5 |
| 40 μM FIP (30D-1-FIP-3T)  | 1    |
| 40 μM BIP (30D-1-BIP)     | 1    |
| 5 μM F3 (30D-1_F3)        | 1    |
| 5 μM B3 (30D-1_B3)        | 1    |
| <i>Bst</i> DNA polymerase | 1    |
| DNA                       | 2    |
| dH <sub>2</sub> O         | 5.5  |
| Total (μL)                | 25   |

| Temperature ( °C) |         |
|-------------------|---------|
| 65                | 120 min |
| 80                | 5 min   |

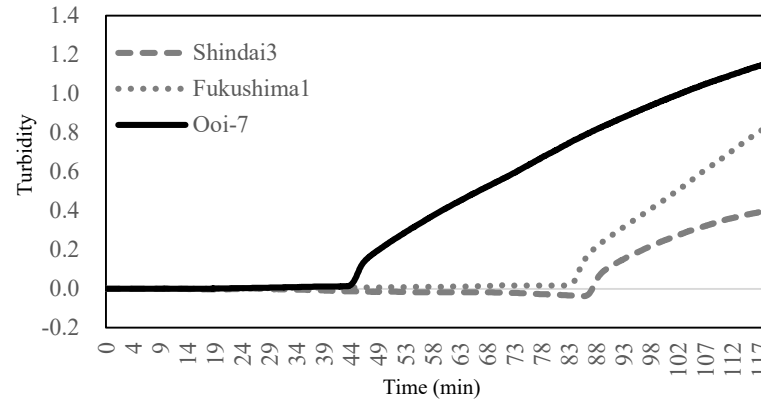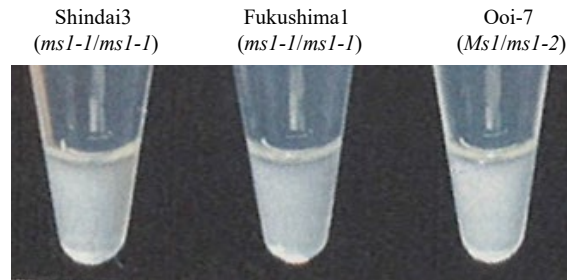

White precipitate was generated after 120 min incubation for all assays. Inclusion of positive control and stopping the reaction at 60 min. is necessary.

| Primer ID    | Primer sequence                                   |
|--------------|---------------------------------------------------|
| 30D-1-FIP-3T | TGTAGTGATCCCCAAAATAGCCGTTAGCATTGCTGGAGCC          |
| 30D-1-BIP    | TGAAGTTTGATACACCGGAGGTTTCTGCTAAATATAACTTTGAACTCTG |
| 30D-1-F3     | TGATTCGCCCTTTCCAAAT                               |
| 30D-1-B3     | AGACAACAGCAATTCATTCA                              |
