# Supplementary material for: Development of diagnostic PCR and LAMP markers for MALE STERILITY 1 (MS1) in Cryptomeria japonica D. Don
Source: PubMed Central journal article supplement (PMC7526249; doi:10.1186/s13104-020-05296-8), 2020-09-29

**Figure S2** Blind test trial for (A) ASP\_ms1-1, (B) ASP\_ms1-1\_wt and (C) ALP\_ms1-2 Twenty-three samples were blind-tested for consistency between the assay and expected genotype based on sequencing analysis.

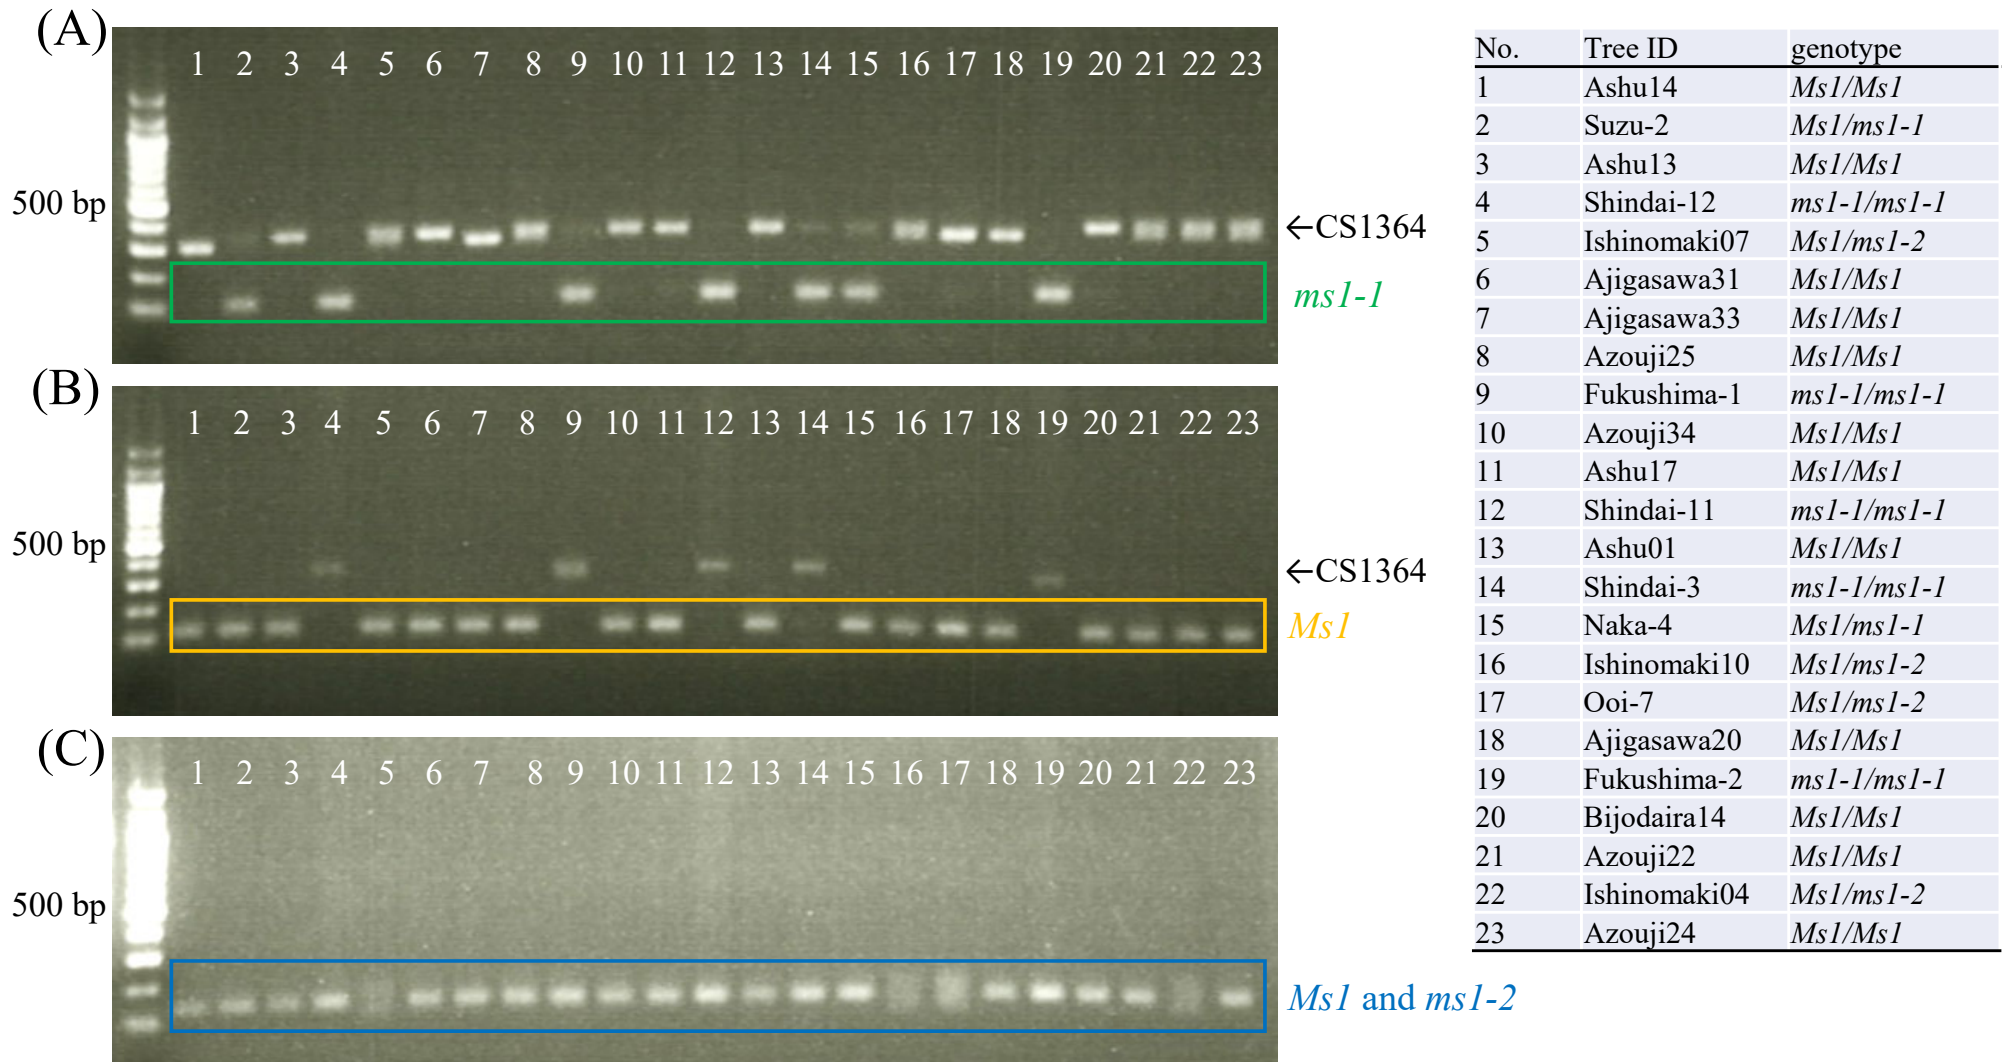

Supplement: 13104_2020_5296_MOESM5_ESM.pdf [file 13104_2020_5296_MOESM5_ESM.pdf]
