# Supplementary material for: Development of diagnostic PCR and LAMP markers for MALE STERILITY 1 (MS1) in Cryptomeria japonica D. Don
Source: PubMed Central journal article supplement (PMC7526249; doi:10.1186/s13104-020-05296-8), 2020-09-29
Supplement: 13104_2020_5296_MOESM7_ESM.pdf [file 13104_2020_5296_MOESM7_ESM.pdf]

**Figure S4** Blind test trial for (A) PNA-LAMP<sub>ms1-1\_wt</sub>, and (B) PNA-LAMP<sub>ms1-1</sub>. Twenty-three samples were blind-tested for consistency between the assay and expected genotypes based on a sequencing analysis. The detailed protocol is available upon request to the corresponding author.

(A)

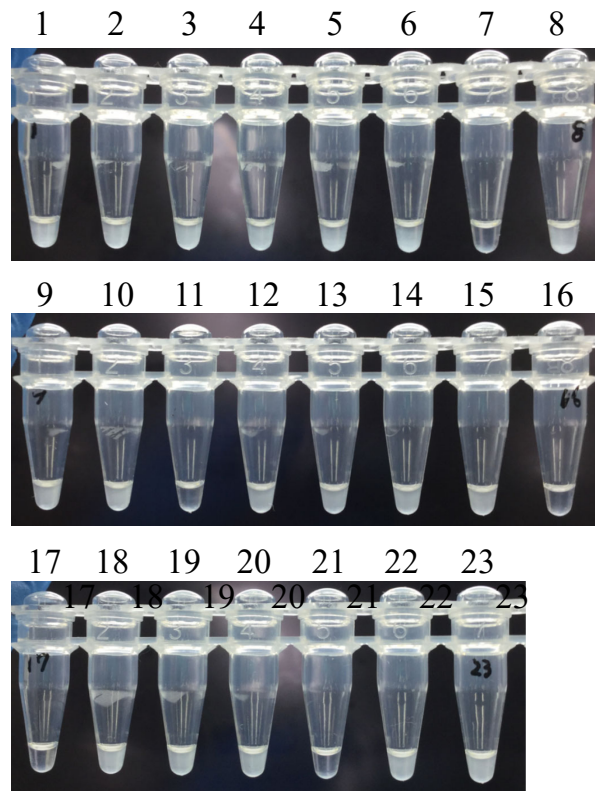

(B)

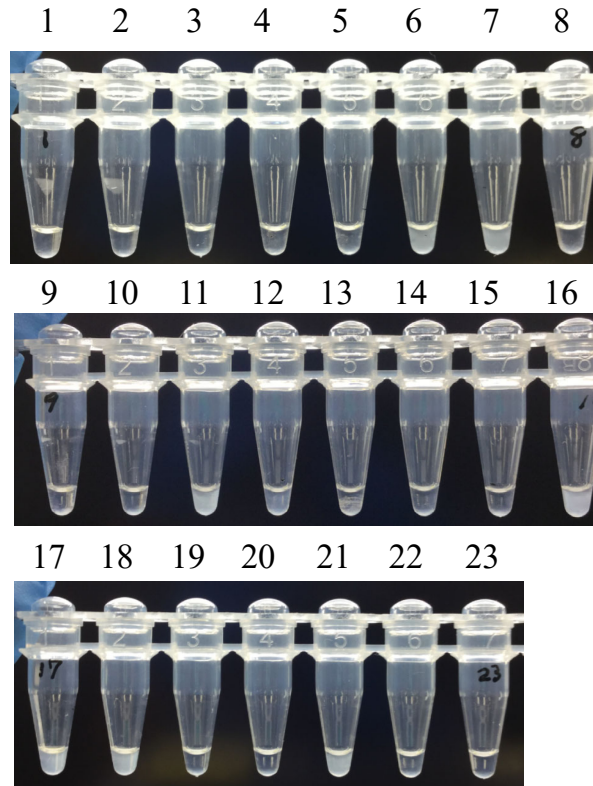

| No. | Tree ID      | genotype           |
|-----|--------------|--------------------|
| 1   | Bijodaira14  | <i>Ms1/Ms1</i>     |
| 2   | Ashu13       | <i>Ms1/Ms1</i>     |
| 3   | Azouji34     | <i>Ms1/Ms1</i>     |
| 4   | Ishinomaki04 | <i>Ms1/ms1-2</i>   |
| 5   | Ashu14       | <i>Ms1/Ms1</i>     |
| 6   | Naka-4       | <i>Ms1/ms1-1</i>   |
| 7   | Shindai-11   | <i>ms1-1/ms1-1</i> |
| 8   | Ajigasawa33  | <i>Ms1/Ms1</i>     |
| 9   | Ashu17       | <i>Ms1/Ms1</i>     |
| 10  | Azouji22     | <i>Ms1/Ms1</i>     |
| 11  | Shindai-3    | <i>ms1-1/ms1-1</i> |
| 12  | Azouji25     | <i>Ms1/Ms1</i>     |
| 13  | Ashu01       | <i>Ms1/Ms1</i>     |
| 14  | Ishinomaki10 | <i>Ms1/ms1-2</i>   |
| 15  | Ajigasawa31  | <i>Ms1/Ms1</i>     |
| 16  | Fukushima-1  | <i>ms1-1/ms1-1</i> |
| 17  | Shindai-12   | <i>ms1-1/ms1-1</i> |
| 18  | Suzu-2       | <i>Ms1/ms1-1</i>   |
| 19  | Azouji24     | <i>Ms1/Ms1</i>     |
| 20  | Ooi-7        | <i>Ms1/ms1-2</i>   |
| 21  | Fukushima-2  | <i>ms1-1/ms1-1</i> |
| 22  | Ishinomaki07 | <i>Ms1/ms1-2</i>   |
| 23  | Ajigasawa20  | <i>Ms1/Ms1</i>     |
